# Supplementary material for: Comparison of integrated PET/MRI with PET/CT in evaluation of endometrial cancer: a retrospective analysis of 81 cases
Source: PeerJ. 2019 Jul 15;7:e7081. doi: 10.7717/peerj.7081 (PMC6637922; doi:10.7717/peerj.7081)
Supplement: Data S1 [file peerj-07-7081-s001.xlsx]

## Sheet: Sheet1
PET-MRI					PET-CT
ID	BMI	FIGO			ID	BMI	FIGO分期
Y2824834	22.4813	IA			Y1439576	25.8166	IA
A726925	25.8478	IA			Y3222738	27.4756	IB
F104324	27.7698	IA			A402765	23.6244	IA
K0105389	27.7344	IA			900555	26.9127	IA
Y2769132	36	IIIA			K0175640	25.7117	II
Y2902674	26.2188	IA			K0151738	28.0404	IA
Y3005887	35.5639	IA			Y2951678	20.8117	IA
Y3024500	22.7583	IA			Y2804064	39.1707	IB
Y3057781	30.478	IA			Y1586094	24.9108	IA
G154769	24.0238	IIIC1			Y2689140	26.9896	IIIC
F973828	29.7442	IA			Y2762488	25.5296	IB
Y2263008	28.764	IA			Y2399130	23.6244	IA
Y2082466	23.8751	IB			Y2382261	25.3906	II
F965180	24.0055	IA			Y2348459	28.8889	IB
Y2025442	29.5858	IB			C198912	22.8329	IA
B640810	21.875	IA			Y2116536	25.6055	II
Y1987664	18.4992	IA			D248423	40.0577	IA
Y1992685	22.0386	IIIA			Y1788701	24.6094	IA
F936828	22.1893	IA			Y1578818	28.306	II
Y1961217	24.6094	IIIC2			Y1374401	25.9701	IA
Y1789808	29.278	IB			F837822	31.1419	II
F709480	21.3039	IA			Y0928626	26.5625	IA
F552220	22.5896	IA			B565731	24.1288	IA
Y0664613	27.3437	IA			F691389	34.5168	IA
Y2292379	27.9155	IA			A141087	20.6905	IIIc1
Y2261119	21.4844	II			Y0583079	31.25	IA
Y2796871	21.6041	II			F481875	26.6728	IA
K0087265	25.7117	IA			C877235	25.2363	IA
Y2760754	23.03	IA			D739361	30.1194	IB
Y2746598	23.4375	IA			Y2815450	24.2215	IA
Y2716520	30.1021	IA			F041304	21.6311	IA
G107436	20.9321	IIIA			Y2811201	23.3067	IA
Y2582114	25.5296	IA			Y2974683	18.8189	IA
923044	26.8386	IA			F925021	29.2969	IA
Y2529137	24.9135	IA			Y2797924	15.625	IA
492752	21.6713	IA			Y2639995	24.4444	IV
Y2494837	23.8281	IB			K0110977	22.0604	IA
Y3279447	23.8751	IA
Y3296374	24.4646	IA
Y1910348	24.4646	IA
Y3416434	30.0781	IA
Y3512377	22.6562	IA
F458953	24.0346	IIIC2
A147513	20.202	IA
